# Supplementary material
Source: publisher figshare collection journal article supplement (https://acs.figshare.com/ndownloader/files/17859794)
Supplement: Supplementary file 1 [file 17859794]

# Arabinoxylan/Cellulose Nanocrystal Hydrogels with Tunable Mechanical Properties

Malika Talantikite\*, Nadège Leray, Céline Moreau, Bernard Cathala

UR1268 Biopolymères Interactions Assemblages, INRA, Rue de la géraudière, 44316,

Nantes, France

Corresponding author: [malika.talantikite@inra.fr](mailto:malika.talantikite@inra.fr)

## Figures

Figure S1. POM images of gels formed with 10 g/L CNC and (a) 7.5 g/L, (b) 10 g/L and (c) 12 g/L AX.

Figure S2. (a) Viscosity vs. concentration for CNC suspensions and AX solutions; (b) Viscosity measurements for solutions containing 10 g/L CNC in the presence of AX at different concentrations at 20°C.

Figure S3. (a)  $G'$  and  $G''$  variation as a function of % strain; and (b) variation of  $G'$  and  $G''$  as a function of time after breaking for 10 g/L CNC + 10 g/L AX at 20°C.

Figure S4. The effect of NaCl addition on the viscosity of a solution containing 10 g/L CNC + 5 g/L AX at 20°C, with photos of the resulting mixtures showing the salt effect.

Figure S5. POM images of solution containing 10 g/L CNC and 10 g/L AX (a, b) before the action of the enzyme, and (c, d) after the action of enzyme with and without the retardation plate.

## Supplementary Figures

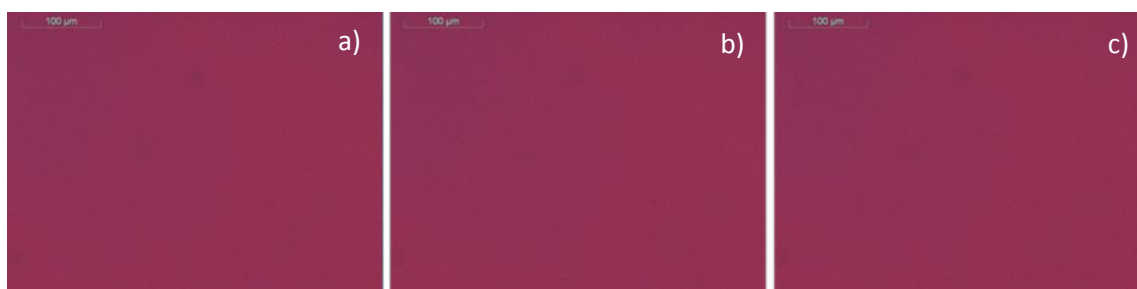

**Figure S1.** POM images of gels formed with 10 g/L CNC and (a) 7.5 g/L, (b) 10 g/L and (c) 12 g/L AX.

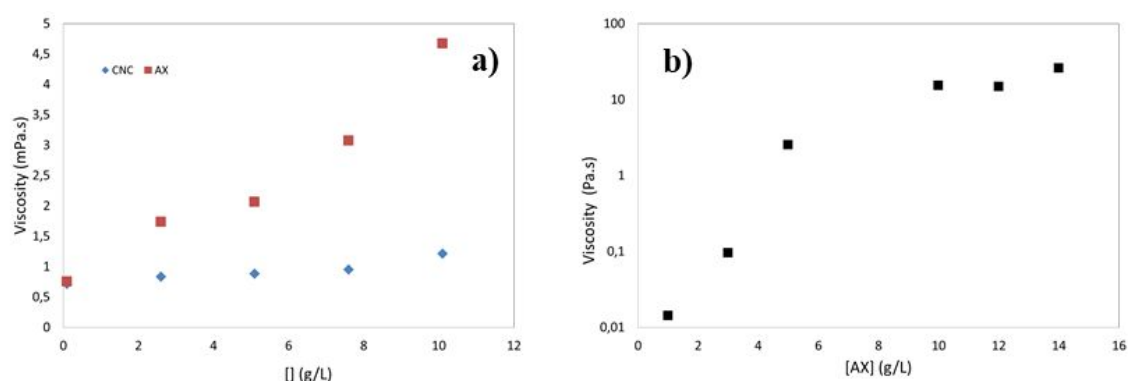

**Figure S2.** (a) Viscosity vs. concentration for CNC suspensions and AX solutions; (b) Viscosity measurements for solutions containing 10 g/L CNC in the presence of AX at different concentrations at 20°C.

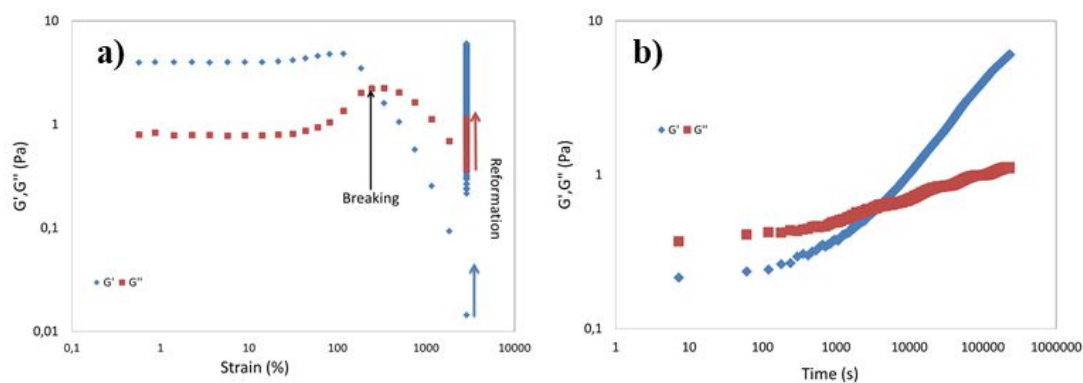

**Figure S3.** (a)  $G'$  and  $G''$  variation as a function of % strain; and (b) variation of  $G'$  and  $G''$  as a function of time after breaking for 10 g/L CNC + 10 g/L AX at 20°C.

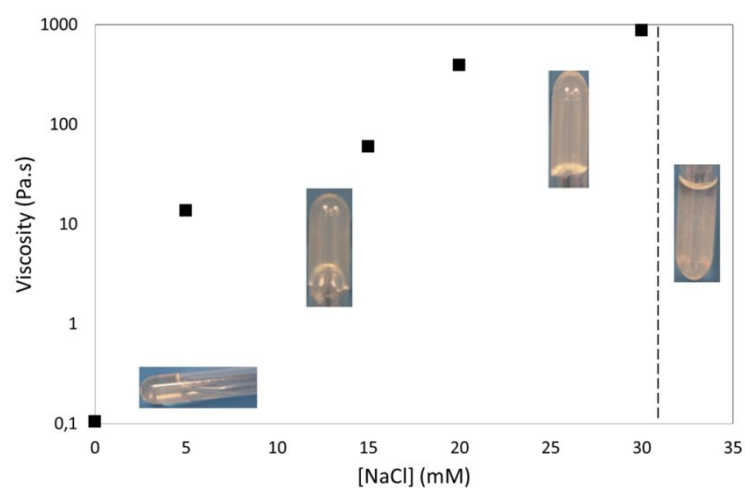

**Figure S4.** The effect of NaCl addition on the viscosity of a solution containing 10 g/L CNC + 5 g/L AX at 20°C, with photos of the resulting mixtures showing the salt effect.

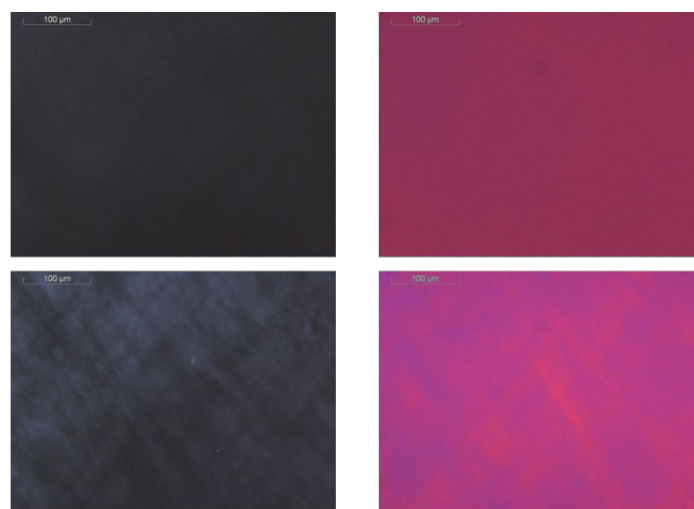

**Figure S5.** POM images of solution containing 10 g/L CNC and 10 g/L AX (a, b) before the action of the enzyme, and (c, d) after the action of enzyme with and without the retardation plate.
